# **Atomic structure of human sapovirus capsid by single particle cryo-electron microscopy**

Naoyuki Miyazaki<sup>1</sup>, Kosuke Murakami<sup>2</sup>, Tomoichiro Oka<sup>2</sup>, Motohiro Miki<sup>3</sup>, Kenji Iwasaki<sup>1</sup>,  
Kazuhiko Katayama<sup>2,4</sup>, Kazuyoshi Murata<sup>5,6\*</sup>

<sup>1</sup> Life Science Center for Survival Dynamics, Tsukuba Advanced Research Alliance, University of Tsukuba, 1-1-1 Tennodai, Tsukuba, Ibaraki, 305-8777, Japan

<sup>2</sup> Department of Virology II, National Institute of Infectious Diseases, Tokyo, Japan

<sup>3</sup> Vaccine & Biomedicine Dept. Life Innovation Research Institute Denka Innovation Center, Denka Co., Ltd., 3-5-1 Asahi-Machi Machida-City Tokyo, 194-8560, Japan

<sup>4</sup> Laboratory of Viral Infection I, Department of Infection Control and Immunology, Ōmura Satoshi Memorial Institute & Graduate School of Infection Control Sciences, Kitasato University, Tokyo, 108-8641, Japan

<sup>5</sup> National Institute for Physiological Sciences, 38 Nishigonaka, Myodaiji, Okazaki, Aichi 444-8585, Japan

<sup>6</sup> Exploratory Research Center on Life and Living Systems (ExCELLS), National Institutes of Natural Sciences, Okazaki, Aichi, Japan

\*Correspondence: [kazum@nips.ac.jp](mailto:kazum@nips.ac.jp) (Ka.M.)

## 1 **Summary**

2 Sapovirus is a cause of acute gastroenteritis in humans and animals. Infants and younger children  
3 have the greatest disease burden. Although it shares many similarities with norovirus, the lack of  
4 detailed structural information has hampered the development of vaccines and therapeutics. Here,  
5 we investigated the human sapovirus VLP by single particle cryo-electron microscopy and are  
6 the first to report the atomic structure of the capsid at 2.9 Å resolution. The atomic model  
7 revealed the domain interactions of the capsid protein and functionally important amino acid  
8 residues. The extended loop from the P1 subdomain was involved in interactions in the P2  
9 domain, forming unique arch-like dimeric protrusions of capsid proteins. All hypervariable  
10 regions that are important candidates for immune response or receptor binding, formed a large  
11 cluster at the top of the P domain. These results pave the way for developing vaccines, antiviral  
12 drugs, and diagnostic systems for this infectious disease.

13

## 14 **Keywords**

15 Sapovirus, *Caliciviridae*, capsid structure, cryo-electron microscopy, single particle analysis,  
16 near-atomic resolution

17

## 18 **Introduction**

19 Sapovirus (SaV) belongs to the *Caliciviridae* family and is well known to cause acute  
20 gastroenteritis in humans as well as animals. Human SaV (HuSaV) contains a positive-sense  
21 single-stranded RNA genome of approximately 7.1 to 7.5 kb in length (Green et al., 2001) and is  
22 divided into four genogroups (GI, GII, GVI, and GV), although animal SaVs are further diverged  
23 and divided into 19 genogroups (Farkas et al., 2004; Yinda et al. 2017; Li et al., 2018). The viral  
24 genome consists of two or three open reading frames (ORFs). ORF1 encodes a polyprotein that  
25 undergoes proteolytic cleavage to form non-structural proteins and a major capsid protein VP1  
26 (viral protein 1). The major capsid protein VP1 is solely responsible for most capsid-related  
27 functions, such as assembly, host interactions, and immunogenicity. ORF2 encodes a minor  
28 structural protein, VP2. In the case of a feline calicivirus (FCV), a member of genus *Vesivirus*,  
29 the minor structural protein VP2 forms a large dodecameric portal-like assembly at a unique  
30 three-fold axis of icosahedral symmetry after receptor engagement (Conley et al., 2019), which  
31 likely functions as a channel for genome release from the capsid. ORF3 encodes a small basic  
32 protein of unknown function (Clarke and Lambden, 2000; Atmar and Estes, 2001). Compared  
33 with well-characterized norovirus and vesivirus, there are limited studies on SaV. In fact, the SaV  
34 structure has been reported only at low and intermediate resolutions (Chen et al., 2004; Miyazaki  
35 et al., 2016), and the atomic structure of the SaV capsid has not yet been elucidated. The SaV  
36 belongs to a different genus from the well-characterized caliciviruses and has different host  
37 specificity and immunogenicity. In addition, an understanding of replication strategies,

38 pathogenesis, and immunogenicity of SaV have also been hampered due to the lack of a  
39 sufficient viral replication system, such as the actual target cells in the host, until the recent  
40 establishment of the SaV cultivation system (Takagi et al., 2020).

41 The *Caliciviridae* family is currently classified into eleven established genera: *Bavovirus*,  
42 *Lagovirus*, *Minovirus*, *Nacovirus*, *Nebovirus*, *Norovirus*, *Recovirus*, *Salovirus*, *Sapovirus*,  
43 *Valovirus*, and *Vesivirus* (Vinjé et al., 2019). The atomic structures of calicivirus VLPs or virions  
44 in three established genera have been determined for Norwalk virus (NV; in genus *Norovirus*),  
45 rabbit hemorrhagic disease virus (RHDV; in genus *Lagovirus*), San Miguel sea lion virus  
46 (SMSV; in genus *Vesivirus*), and FCV (in genus *Vesivirus*), while atomic structures in other  
47 genera, including *Sapovirus*, remain unknown (Prasad et al., 1999; Chen et al., 2006; Ossiboff et  
48 al., 2010; Wang et al., 2013; Song et al., 2020). The calicivirus virions have a mostly conserved  
49 capsid shell, which is composed of 180 copies of VP1 arranged in a T=3 icosahedral symmetry.  
50 The VP1 proteins are designated A, B, and C in the icosahedral asymmetric unit according to  
51 their positions, which form quasi-equivalent A/B and C/C dimers (Prasad et al., 1999; Chen et al.,  
52 2006; Ossiboff et al., 2010). Each VP1 capsid monomer contains two principal domains, shell  
53 (S) and protrusion (P) domains, with an N-terminal arm located inside the capsid shell. The S  
54 domains represent the most conserved region of the amino acid sequence among caliciviruses,  
55 and have a classical eight-stranded  $\beta$  sandwich, which has been commonly found in T=3  
56 icosahedral viruses (Rossmann and Johnson, 1989). The fundamental function of the S domains  
57 is to form a contiguous icosahedral capsid shell responsible for the protection of their viral

58 genome from the outer environment. In contrast, structures and amino acid sequences of the P  
59 domain are rather variable among caliciviruses because this domain is involved in virus-host  
60 interactions and immunogenicity. Indeed, the sizes of the P2 domains are considerably different  
61 between *Norovirus* and *Vesivirus*, which are 127 and 176 amino acid residues, respectively  
62 (Prasad et al., 1999; Chen et al., 2006). The P domains form protrusions on the capsid shell  
63 composed of the S domains and each P domain can be further divided into two subdomains  
64 called P1 and P2. In spite of the little sequence conservation, protein folds of the P1 and P2  
65 subdomains are conserved among caliciviruses, but unique to other viruses except for hepatitis E  
66 virus (HEV: Yamashita et al., 2009; Guu et al., 2009; Xing et al., 2010). The relative orientation  
67 between S-P1-P2 domains shows inter-genus variations (rarely including intra-genus variations).  
68 For example, only the P2 domain is involved in the dimeric interactions in *Vesivirus*, while both  
69 the P1 and P2 domains participate in the dimeric interactions in *Norovirus*. Because of the  
70 inter-genus diversities, we are eager to elucidate the atomic structures of other genera, including  
71 *Sapovirus*, in order to understand their immunogenicity and virus-host interactions in more  
72 detail.

73 Here, we determined the capsid structure of a HuSaV virus-like particle (HuSaV-VLP) at 2.9  
74 Å resolution by single particle cryo-electron microscopy (cryo-EM), and successfully built an  
75 atomic model of the capsid. The atomic model revealed the domain boundary and the  
76 functionally important amino acid residues in the capsid protein, 1) the unique arch-like dimeric  
77 protrusion on the capsid surface provides hints for a stable construct design for vaccine

78 development, and 2) the detailed structure of the large hypervariable region cluster at the top of  
79 the P domain accelerates the development of vaccines and antivirals.

80

81

## 82 **Results and Discussion**

### 83 ***Structure determination of HuSaV VLP***

84 The capsid protein VP1 of HuSaV from the Nichinan strain in genogroup I (GI. Nichinan;  
85 Iwakiri et al., 2009) was expressed in a baculovirus expression system, and the self-assembled  
86 and secreted HuSaV-VLPs from the cells were purified from the culture medium. The  
87 three-dimensional (3D) structure was determined at 2.9 Å resolution by cryo-EM single-particle  
88 analysis (Figures 1, S1, and S2). The cryo-EM map clearly shows a T=3 icosahedral symmetry  
89 with 90 protrusions, composed of 180 copies of the VP1 protein in total, distributed along the  
90 icosahedral 2-fold axes (C/C dimers) and quasi 2-fold axes (A/B dimers) on the surface (Figures  
91 1A and S2A). The bulky side chains are clearly resolved in the cryo-EM, and the atomic models  
92 are unambiguously built for the VP1 proteins (Figures 1B and S1E). The cryo-EM map allowed  
93 atomic modeling of residues 38–554 for subunit A, residues 21–554 for subunit B, and residues  
94 21–554 for subunit C, except for one disordered loop (residues 380–384) for all subunits (Figure  
95 2). The icosahedrally independent A/B and C/C dimers show slightly different conformations,  
96 mainly between S-domains in each dimer, which are the bent and flat conformations, respectively,  
97 as in other T=3 viruses (Figure S3). The  $\beta$ I- $\beta$ A' loop between the S-domain and P-domain,

98 containing a  $\beta$ -turn (residues 231–234), undergoes a hinge-like motion to adapt the two  
99 conformers (red asterisks in Figure S3). In addition, N-terminal regions of residues 21–37 in the  
100 B- and C-subunits extend underneath the capsid shell and interact with the neighboring subunits  
101 around icosahedral 3-fold axes (Figure 3A), although the N-terminal region is disordered in the  
102 A-subunit, and no N-terminal network is observed around icosahedral 5-fold axes. In particular,  
103 residues A25-T26 form a short inter-subunit  $\beta$ -sheet with F154-V155 in the adjacent subunit  
104 (Figure 3B). Therefore, the N-terminal network around the icosahedral 3-fold axes likely  
105 stabilized the hexameric units in the capsid.

106

### 107 *The structure of the major capsid VP1 protein of HuSaV*

108 The overall structure of the major capsid VP1 protein of HuSaV from GI. Nichinan  
109 comprises two principal domains: S (residues 69–232) and P (residues 233–554) domains, with  
110 an N-terminal arm (residues 21–68 in subunit B and C; residues 38–68 in subunit A) inside the  
111 capsid shell (Figure 2). The P domain is further divided into two subdomains, P1 (233–281 and  
112 residues 444–554) and P2 (residues 282–443) subdomains. These domain boundaries are  
113 consistent with those from previous result based on the homology model built with an 8.5-Å  
114 resolution cryo-EM map (Miyazaki et al., 2016). We found a disordered region (residues 381–  
115 384) in the P2 subdomain, which is located on the exterior surface of the viral particle (dashed  
116 circles in Figure 2B), and the  $\beta$ D''- $\beta$ E'' loop, including the disordered region, which is one of the  
117 most valuable amino acid sequences among the HuSaVs (Figure 4).

118        There are two well-conserved motifs in the SaV VP1, “PPG” (residues 136–138) and “GWS”  
119        (residues 281–283) (Oka et al, 2015), indicated by red and black asterisks above sequences in  
120        Figure 4, respectively. The former “PPG” motif exists in a  $\beta$ E- $\beta$ F loop and is a part of  $\beta$ -turn  
121        (PPGV) just following a  $\beta$ E-strand in the S-domain, which is not exposed to the viral surface and  
122        is located at the inter-domain interface between the S-domains (Figures 5A and 5C). The loop  
123        after the  $\beta$ -turn interacts with the P1-subdomain (black arrowhead in Figure 5A). These  
124        observations suggest that the conserved “PPG” motif forming the  $\beta$ -turn is involved in protein  
125        folding, dimer formation, and assembly into the particle. The latter “GWS” motif is located at the  
126        domain boundary between the P1 and P2 subdomains (Figure 5A). The “GWS” motif in the  
127         $\beta$ A’- $\beta$ A” loop is not exposed to the viral surface as in the motif “PPG” suggesting that the motif  
128        is not involved in receptor binding, particle formation, or stability because W282 in the motif is  
129        inserted into the P2 subdomain and forms a hydrophobic core with L322, I393, and M442 in the  
130        P2 subdomains (Figure 5B).

131

### 132        *Interactions between P domains in a dimeric protrusion*

133        The P domain of HuSaV forms a dimer on the surface of virus particles, and the inter-dimer  
134        interaction occurs in the most exterior region of the dimer (Figures 1B and 6A), and the  
135        inter-dimer orientation is similar to that of SMSV and FCV (Chen et al., 2006; Ossiboff et al.,  
136        2010) as in the previous structure analysis at an 8-Å resolution (Miyazaki et al., 2016). In this  
137        study, the high-resolution structure at 2.9 Å resolution revealed the amino acid residues involved



138 in the interaction between the P domains to build a stable P domain dimer. Unexpectedly, in  
139 addition to the residues in the P2 subdomain, the residues in the P1 subdomain are involved in  
140 the interaction between the P domains (Figure 6A). The  $\beta B'$ - $\alpha 4$  loop (residues 465–469) in the  
141 P1 subdomain and the  $\beta C''$ - $\beta D''$  loop in the P2 subdomain are mainly involved in the interaction  
142 between the P domains. Hydrophobic residues are present throughout the binding interface,  
143 representing the hydrophobic interactions that appear to be dominant for the dimerization (Figure  
144 6B), although some hydrophilic interactions are also observed, for example, between the  $\beta B'$ - $\alpha 4$   
145 loop and the  $\beta C''$ - $\beta D''$  loop. We calculated and compared buried surface areas between the P  
146 domains of caliciviruses. The buried surface area between the P domains of HuSaV is  $1.1 \times 10^3$   
147  $\text{\AA}^2$ , which is significantly smaller than those of other viruses ( $1.5$ - $1.7 \times 10^3 \text{\AA}^2$ ) (Figure 6C).  
148 These results suggest that HuSaV shows a unique arch-like dimeric protrusion in *Caliciviridae*.  
149 Furthermore, additional mechanisms may be required to stabilize the construct when the P  
150 domain dimer is used as a vaccine antigen.

151

### 152 ***Immune responses of HuSaVs***

153 To examine the immune reactivity of HuSaVs, we analyzed the conserved sequences in the  
154 structure (Figure 7). When the amino acid conservation across the human GI, GII, GIV, and GV  
155 SaVs, listed in Figure 4, are mapped on the 3D structure of VP1, the amino acid residues in the  
156 P2 subdomain on the viral surface are extremely diverged, while those in the S and P1  
157 subdomains are highly and intermediately conserved, respectively (Figure 7A). Furthermore, the

158 primary sequence comparison shows that there are various insertions and deletions among the  
159 HuSaV stains in the P2 subdomains (Figure 4). In particular, residues 294–306 in  $\beta A''$ - $\beta B''$ ,  
160 337–347 in  $\beta B''$ - $\beta C''$ , 375–388 in  $\beta D''$ - $\beta E''$  (including a disordered region, 380–384), and 403–  
161 417 in  $\beta E''$ - $\beta F''$  show significant sequence variabilities between the HuSaVs, which are  
162 designated as hypervariable region 1 (HVR1), HVR2, HVR3, and HVR4, respectively (Figure 4).  
163 These regions form a large cluster at the top of the P domain (Figure 7B). Generally, it is  
164 believed that the P domain projected from the viral surface is mainly involved in immune  
165 responses in caliciviruses, and the diverged amino acid sequences located on the most exterior  
166 surface are responsible for evading the host's immune system. For instance, the neutralization  
167 antigens of FCV existing in the HVR of residues 408–529 (Matsuura Y et al., 2001; Tohya et al.,  
168 1991) are exclusively located in the P domain on the viral surface (Chen et al., 2006). HuSaV has  
169 a large cluster consisting of four HVRs on the viral surface, suggesting that the viral strategy  
170 against the host immune system, proposed by other caliciviruses, can be strongly applied to  
171 HuSaV.

172 Genogroup-specific and genotype-specific monoclonal antibodies (mAbs) have been  
173 identified in a previous study (Kitamoto et al., 2012), reflecting their sequence diversity on the  
174 viral surface. However, in spite of the sequence diversity, fully cross-reactive mAbs to  
175 heterologous human genogroups and genotypes have also been found. These facts suggest that  
176 SaV capsid proteins have at least one epitope common to human GI, GII, GIV, and GV  
177 genogroups (Kitamoto et al., 2012). To examine the common epitope, we plotted the fully

178 conserved amino acid residues (Figure 4) used in a previous immunological study (Kitamoto et  
179 al., 2012) on the molecular surface of VP1. The fully conserved amino acid residues accessible  
180 by the mAbs are limited to the S domain located in the region of the depression around the five-  
181 or six-fold axes on the viral surface (orange circle in Figure 7C). Therefore, the result suggests  
182 that one of the cross-reactive mAbs for all HuSaVs recognizes the S domain instead of the P  
183 domain.

184 Next, we examined epitopes recognized by mAbs specific to genogroups (GI, GII, and GIV)  
185 (Figure S4). In the case of GI and GII, the amino acid residues conserved in each genogroup  
186 form clusters in the P domain on the viral surface (magenta circles in Figures S4D-E) but not in  
187 the S domain, suggesting that the GI- and GII-specific mAbs recognize the P2 subdomain. In  
188 contrast, we found several clusters entirely in the P domain of GIV (Figures S4C and S4F).  
189 Therefore, the GIV-specific mAbs also likely bind to the P domain. However, we found clusters  
190 in the S domain (orange circle in Figure S4F), and therefore the possibility that the GIV-specific  
191 mAbs recognize the S domain cannot be completely excluded.

192 Genotype-specific mAbs recognize amino acid residues that are not conserved even within  
193 the genogroups. Many such amino acid residues are found in HVR1 to HVR4 on the viral  
194 surface, as described above (Figures 4 and 7A-B) as well as in the  $\beta F''$ - $\beta B'$  loop. Therefore, it is  
195 considered that the highly variable regions are recognized by genotype-specific mAbs.

196

197 *Host specificity of HuSaV*

198       The receptor molecules for HuSaV have not been identified so far, and therefore the HuSaV  
199       host recognition mechanism remains unknown. Porcine sapovirus (PoSaV) Cowden strain in a  
200       genogroup GIII is the only culturable sapovirus that has been adapted to tissue culture-adapted  
201       mutations (Lu et al., 2016; Takagi et al., 2020). Compared to the wild-type (WT) PoSaV  
202       Cowden strain, tissue culture-adapted (TC) PoSaV has six conserved amino acid substitutions  
203       in the capsid protein (Lu et al., 2016). Four of the six amino acid substitutions in VP1 (residues  
204       C178S, Y289H, M324I, and E328G) are critical for the cell culture adaptation of the PoSaV  
205       Cowden strain. Although reversion of the mutations at the other two substitutions in VP1  
206       (residues 291 and 295) from that of the TC strain to that of the WT reduced viral replication *in*  
207       *vitro*, the revertants enhanced viral replication *in vivo* and induced higher-level serum and  
208       mucosal antibody responses than those induced by the TC PoSaV Cowden strain (Lu et al.,  
209       2016). We mapped these four essential and two functional mutations on the atomic structure of  
210       HuSaV. The corresponding residues for the six tissue culture-adapted mutations were S186,  
211       H298, Y300, R304, L334, and M338 (black arrowheads in Figure S5). Except for one residue  
212       S186 in the S-domain, the other five residues are exposed to the outer environment and are  
213       located on the receptor-accessible surface (Figure 8), suggesting that these residues in the P  
214       domain are actually involved in the receptor binding in the PoSaV. However, as the six residues  
215       are not conserved in HuSaV (black arrows in Figure 4), the receptor molecule of HuSaV might  
216       be different from that of PoSaV. Further studies are required to elucidate the receptor  
217       recognition mechanism of the SaV based on the atomic structure of HuSaV VP1.

218

219

220 **Acknowledgements**

221 This work was supported by the Platform Project for Drug Discovery, Informatics, and Structural  
222 life Science (PDIS) from the Ministry of Education, Culture, Sports, Science and Technology  
223 (MEXT), the Japan Agency for Medical Research and Development (AMED) for Supporting  
224 Drug Discovery and Life Science Research (Basis for Supporting Innovative Drug Discovery  
225 and Life Science Research (BINDS)) (Grant No. JP18am0101072 (support number 0194 ) to  
226 N.M. and K.I.), AMED (Grant No. 20fk0108121h0402 and 16fk0108304h2003 to Ka.M. and  
227 Grant No. 16fk0108304j9003 to K.K., Grant No. 16fk0108304j0203 to T.O.), MEXT KAKENHI  
228 (Grant No. JP16H00786 to Ka.M.), and the collaborative programs for National Institute for  
229 Physiological Sciences (to K.K.).

230

231 **Author Contributions**

232 N.M., K.K. and Ka.M. conceived the project. T.O., Ko.M, and K.K. and M.M. expressed the VP1  
233 protein of HuSaV and purified the HuSaV VLPs. N.M. and Ka.M. prepared cryo-EM grids and  
234 checked them at 200kV cryo-EM. N.M. and K.I. collected final high resolution cryo-EM images  
235 using 300kV cryo-EM. N.M. processed the EM data and reconstructed the final EM map. N.M.  
236 built and refined the atomic model. N.M. and Ka.M. analyzed the structure. All authors wrote the  
237 paper and contributed to experimental design and wrote the manuscript.

238

239 **Declaration of Interests**

240 The authors declare no competing financial interest.

241

242

243 **References**

244 Adams, P.D., Afonine, P.V., Bunkoczi, G., Chen, V.B., Davis, I.W., Echols N., Headd, J.J.,

245 Hung, L.W., Kapral, G.J., Grosse-Kunstleve, R.W. et al. (2010). PHENIX: a

246 comprehensive Python-based system for macromolecular structure solution. *Acta*

247 *Crystallogr. D* 66, 213-221.

248 Atmar R.L. and Estes, M.K. (2001). Diagnosis of noncultivable gastroenteritis viruses, the

249 human caliciviruses. *Clin. Microbiol. Rev.* 14, 15-37.

250 Chen, R., Neill, J.D., Estes, M.K., and Prasad, B.V.V. (2006). X-ray structure of a native

251 calicivirus: Structural insights into antigenic diversity and host specificity. *Proc. Natl.*

252 *Acad. Sci U S A* 103, 8048-8053.

253 Chen, R., Neill, J.D., Noel, J.S., Hutson, A.M., Glass, R.I., Estes, M.K., and Prasad, B.V.V.

254 (2004). Inter- and intragenus structural variations in caliciviruses and their functional

255 implications. *J. Virol.* 78, 6469-6479.

256 Chen, V.B., Arendall W.B. 3rd, Headd, J.J., Keedy, D.A., Immormino, R.M., Kapral, G.J.,  
257 Murray, L.W., Richardson, J.S., and Richardson, D.C. (2010). MolProbity: all-atom  
258 structure validation for macromolecular crystallography. *Acta Crystallogr. D* 66, 12-21.

259 Clarke I.N., and Lambden P.R. (2000). Organization and expression of calicivirus genes. *J.*  
260 *Infect. Dis.* 181 Suppl. 2, S309-316.

261 Conley, M.J., McElwee, M., Azmi, L., Gabrielsen, M., Byron, O., Goodfellow, I.G., and Bhella,  
262 D. (2019). Calicivirus VP2 forms a portal-like assembly following receptor engagement.  
263 *Nature* 565, 377-381.

264 Emsley, P., Lohkamp, B., Scott, W.G., and Cowtan, K. (2010). Features and development of  
265 Coot. *Acta Crystallogr. D* 66, 486-501.

266 Farkas, T., Zhong, W.M., Jing, Y., Huang, P.W., Espinosa, S.M., Martinez, N., Morrow, A.L.,  
267 Ruiz-Palacios, G.M., Pickering, L.K. and Jiang, X. (2004). Genetic diversity among  
268 sapoviruses. *Arch. Virol.* 149, 1309-1323.

269 Goddard, T.D., Huang, C.C., Meng, E.C., Pettersen E.F., Couch, G.S., Morris, J.H., and Ferrin,  
270 T.E. UCSF ChimeraX - Meeting modern challenges in visualization and analysis. *Protein*  
271 *Sci.* 27, 14-25.

272 Gouet, P., Robert, X., and Courcelle, E. (2003). ESPript/ENDscript: extracting and rendering  
273 sequence and 3D information from atomic structures of proteins. *Nucl. Acids Res.* 31,  
274 3320-3323.

- 275 Grigorieff, N., and Harrison, S.C. (2011). Near-atomic resolution reconstruction of icosahedral  
276 viruses from electron cryo-microscopy. *Curr. Opin. Struct. Biol.* *21*, 265-273.
- 277 Guu T.S.Y., Liu, Z., Ye, Q., Mata, D.A., Li, K., Yin, C., Zhang, J., and Tao, Y.J. (2009)  
278 Structure of the hepatitis E virus-like particle suggests mechanisms for virus assembly and  
279 receptor binding. *Proc. Natl. Acad. Sci. U S A* *106*, 12992-12997.
- 280 Iwakiri, A., Ganmyo, H., Yamamoto, S., Otao, K., Mikasa, M., Kizoe, S., Katayama, K., Wakita,  
281 T., Takeda, N., and Oka, T. (2009). Quantitative analysis of fecal sapovirus shedding:  
282 identification of nucleotide substitutions in the capsid protein during prolonged excretion.  
283 *Arch. Virol.* *154*, 689-693.
- 284 Jones, T.A., Zou, J.-Y., Cowman, S.W., and Kjeldgaard, M. (1991). Improved methods for  
285 building protein models in electron-density maps and the location of errors in these models.  
286 *Acta Crystallogr. A* *47*, 110-119.
- 287 Kitamoto, N., Oka, T., Katayama, K., Li, T.-C. Takeda, N., Kato, Y., Miyoshi, T., and Tanaka, T.  
288 (2012). Novel monoclonal antibodies broadly reactive to human recombinant  
289 sapovirus-like particles. *Microbiol. Immunol.* *56*, 760-770.
- 290 Li, J., Zhang, W., Cui, L., Shen, Q., and Hua, X. (2018). Metagenomic identification, genetic  
291 characterization and genotyping of porcine sapoviruses. *Infect. Genet. Evol.* *62*, 244-252.
- 292 Li, X., Mooney, P., Zheng, S., Booth, C., Braunfeld, M. B., Gubbens, S., Agard, D.A., and  
293 Cheng, Y. (2013). Electron counting and beam-induced motion correction enable near  
294 atomic resolution single particle cryoEM. *Nat. Methods* *10*, 584-590.



- 295 Lu, Z., Yokoyama, M., Chen, N., Oka, T., Jung, K., Chang, K.-O., Annamalai, T., Wang, Q., and  
296 Saif, L.J. (2016). Mechanism of cell culture adaptation of an enteric calicivirus, the porcine  
297 sapovirus cowden strain. *J. Virol.* *90*, 1345-1358.
- 298 Matsuura, Y., Tohya, Y., Mochizuki, M., Takase, K., and Sugimura, T. (2001). Identification of  
299 conformational neutralizing epitopes on the capsid protein of canine calicivirus. *J. Gen.*  
300 *Virol.* *82*, 1685-1702.
- 301 Miyazaki, N., Taylor, D.W., Hansman, G.S., and Murata K. (2016). Antigenic and cryo-electron  
302 microscopy structure analysis of a chimeric sapovirus capsid. *J. Virol.* *90*, 2664-2675.
- 303 Oka, T., Lu, Z., Phan, T., Delwart, E.L., and Saif, L.J. (2016). Genetic characterization and  
304 classification of human and animal sapoviruses. *PLoS ONE* *11*, e0156373.
- 305 Oka, T., Wang, Q., Katayama, K., and Saif, L.J. (2015). Comprehensive review of human  
306 sapoviruses. *Clin. Microbiol. Rev.* *28*, 32-53.
- 307 Ossiboff, R.J., Zhou, Y., Lighfoot, P.J., Prasad, B.V.V., and Parker, J.S.L. (2010).  
308 Conformational changes in the capsid of a calicivirus upon interaction with its functional  
309 receptor. *J. Virol.* *84*, 5550-5564.
- 310 Pettersen, E.F., Goddard, T.D., Huang, C.C., Couch, G.S., Greenblatt, D.M., Meng, E.C., and  
311 Ferrin, T.E. (2004). UCSF Chimera - A visualization system for exploratory research and  
312 analysis. *J. Comput. Chem.* *25*, 1605-0612.
- 313 Prasad, B.V.V., Hardy, M.E., Dokland, T., Bella, J., Rossmann, M.G., and Estes, M.K. (1999).  
314 X-ray crystallographic structure of the Norwalk virus capsid, *Science* *286*, 287-290.

- 315 Risler, J.L., Delorme, M.O., Delacroix, H., and Henaut, A. (1988). Amino acid substitutions in  
316 structurally related proteins. A pattern recognition approach. Determination of a new and  
317 efficient scoring matrix. *J. Mol. Biol.* *204*, 1019-1029.
- 318 Rohou, A. and Grigorieff, N. (2015). CTFFIND4: Fast and accurate defocus estimation from  
319 electron micrographs. *J. Struct. Biol.* *192*, 216-221.
- 320 Rossmann M.G. and Johnson, J.E. (1989) Icosahedral RNA virus structure. *Annu. Rev. Biochem.*  
321 *58*, 533-573.
- 322 Scheres, S.H. (2012). RELION: implementation of a Bayesian approach to cryo-EM structure  
323 determination. *J. Struct. Biol.* *180*, 519-530.
- 324 Song, C., Takai-Todaka, R, Miki, M., Haga, K., Fjimoto, A., Ishiyama, R., Oikawa, K.,  
325 Yokoyama, M., Miyazaki, N., Iwasaki K., Murakami, K., Katayama, K., and Murata, K.  
326 (2020). Dynamic rotation of the protruding domain enhances the infectivity of rotavirus.  
327 *PLoS Pathog.* *16*, e1008619.
- 328 Takagi, H., Oka, T., Shimoike, T., Saito, H., Kobayashi, T., Takahashi, T., Tatsumi, C., Kataoka,  
329 M., Wang, Q., Saif, L.J., and Noda, M. (2020). Human sapovirus propagation in human  
330 cell lines supplemented with bile acids. *Proc. Natl. Acad. Sci. U S A*, online ahead of print.  
331 Doi: 10.1073/pnas.2007310117.
- 332 Tang, G., Peng, L., Baldwin, P.R., Mann, D.S., Jiang, W., Rees, I., and Ludtke, S.J. (2007).  
333 EMAN2: an extensible image processing suite for electron microscopy. *J. Struct. Biol.* *157*,  
334 38-46.

- 335 Thompson, J.D., Higgins, D.G., and Gibson, T.J. (1994). CLUSTAL W: improving the  
336 sensitivity of progressive multiple sequence alignment through sequence weighting,  
337 position-specific gap penalties and weight matrix choice. *Nucleic Acids Res.* 22,  
338 4673-4680.
- 339 Tohya, Y., Masuoka, K., Takahashi, E., and Mikami, T. (1991). Neutralizing epitopes of feline  
340 calicivirus. *Arch. Virol.* 117, 173-181.
- 341 Wang, X., Xu, F., Liu, J., Gao, B., Liu, Y., Zhai, Y., Ma, J., Zhang, K., Baker, T.S., Schulten, K.,  
342 Zheng, D., Pang, H., and Sun, F. (2013). Atomic model of rabbit hemorrhagic disease virus  
343 by cryo-electron microscopy and crystallography. *PLoS Pathog.* 9, e1003132.
- 344 Xing, L., Li, T.-C., Mayazaki, N., Simon, M.N., Wall, J.S., Moore, M., Wang, C.-Y., Takeda, N.,  
345 Wakita, T., Miyamura, T., and Cheng, R.H. (2010). Structure of hepatitis E virion-sized  
346 particle reveals an RNA-dependent viral assembly pathway. *J. Biol. Chem.* 285,  
347 33175-33183.
- 348 Yamashita, T., Mori, Y., Miyazaki, N., Cheng, R.H., Yoshimura, M., Unno, H., Shima, R.,  
349 Moriishi, K., Tsukihara, T., Li, T.C., Takeda, N., Miyamura, T., and Matsuura, Y. (2009).  
350 Biological and immunological characteristics of hepatitis E virus-like particles based on  
351 the crystal structure. *Proc. Natl. Acad. Sci. U S A* 103, 12986-12991.
- 352 Yinda, C.K., Conceição-Neto, N., Zeller, M., Heylen, E., Maes, P., Ghogomu, S.M., Ranst, M.V.,  
353 and Matthijssens, J. (2017). Novel highly divergent sapoviruses detected by

354 metagenomics analysis in straw-colored fruit bats in Cameroon. *Emerg. Microbes Infect.* 6,

355 e38.

356 Zhang, K. (2017). <http://www.mrc-lmb.cam.ac.uk/kzhang/> .

357

## 358 **Methods**

### 359 ***Expression of HuSaV VP1 protein in insect cells and purification of HuSaV-VLP***

360 A baculovirus expression system constructed in a previous study (Kitamoto et al., 2012) was  
361 employed in this study. To produce VLPs of the Nichinan strain, the recombinant baculovirus of  
362 the HuSaV VP1 of the Nichinan strain was propagated with Sf9 cells (Thermo Fischer Scientific,  
363 USA) as described previously (Kitamoto et al., 2012). The recombinant baculovirus was used to  
364 infect approximately  $3 \times 10^6$  confluent Hi5 cells (Thermo Fischer Scientific, USA) at a  
365 multiplicity of infection (MOI) of 5–10 in 1.5 mL Ex-Cell 405 medium (Merck, Germany), and  
366 the infected cells were incubated at 26 °C. The culture medium was harvested 5–6 days  
367 post-infection (dpi), centrifuged for 10 min at  $3,000 \times g$ , and further centrifuged for 30 min at  
368  $10,000 \times g$ . The VLPs were concentrated by ultracentrifugation for 2 h at 31,000 rpm at 4 °C  
369 (Beckman SW-31Ti rotor), and then resuspended in 500  $\mu$ L of Ex-Cell 405 medium. Samples  
370 were examined for VLP formation by conventional electron microscopy after the VLPs were  
371 purified by CsCl as described previously (Miyazaki et al., 2016).

372

### 373 ***Cryo-electron microscopy (cryo-EM) data collection and processing***

374 For cryo-EM experiments, 3  $\mu$ L of sample solution was applied to a Quantifoil holey carbon  
375 grid (R1.2/1.3, Mo 200 mesh, Quantifoil Micro Tools GmbH) at 4 °C with 100% humidity, and  
376 then plunge-frozen into liquid ethane using a Vitrobot Mark IV (Thermo Fisher Scientific, USA).  
377 The cryo-EM grids were examined at liquid nitrogen temperature using a cryo-electron

378 microscope (Titan Krios, Thermo Fisher Scientific), incorporating a field emission gun and a  
379 Cs-corrector (Corrected electron optical systems GmbH). The microscope was operated at 300  
380 kV and a nominal magnification of  $\times 75,000$ . Movie frames were recorded using a Falcon II  
381 direct electron detector (Thermo Fisher Scientific), applied with a nominal underfocus value  
382 ranging from -1.0 to -2.5  $\mu\text{m}$ . An accumulated dose of 20 electrons per  $\text{\AA}^2$  on the sample was  
383 fractionated into a movie stack of 16 image frames with 0.0625 s per frame, for a total exposure  
384 time of 1.0 s. The workflow of the cryo-EM image processes is summarized in Figure S1B.  
385 Movies (0.87  $\text{\AA}/\text{pixel}$ ) were subsequently aligned and summed using MotionCorr software (Li et  
386 al., 2013) to obtain a final motion-corrected image. Estimation of the contrast transfer function  
387 was performed using the CTFFIND program (Rohou and Grigorieff, 2015). Micrographs  
388 exhibiting poor power spectra (based on the extent and regularity of the Thon rings) were  
389 rejected (4.0  $\text{\AA}$  resolution cutoff). Approximately 2,000 particles were manually picked using  
390 EMAN2 (Tang et al., 2007) and used to generate 2D classes for templates for auto-picking in  
391 Gautomatch (Zhang, 2017; K. Zhang, MRC Laboratory of Molecular Biology, Cambridge, UK,  
392 <http://www.mrc-lmb.cam.ac.uk/kzhang/Gautomatch>). All the following processes were  
393 performed using RELIION (Scheres, 2012). 79,147 auto-picked particles from 2,918  
394 micrographs were subjected to reference-free 2D classification. A total of 77,352 particles were  
395 selected from acceptable 2D classes (Figure S1C) and were then subjected to two rounds of 3D  
396 classification with icosahedral symmetry. Finally, the 3D structure was reconstructed from  
397 23,434 particles at 2.9  $\text{\AA}$  resolution, which was estimated by the gold standard FSC with a 0.143

398 cutoff (Grigorieff and Harrison, 2011). The local resolution variations were also calculated using  
399 the RELION software (Figure S2).

400

#### 401 ***Atomic model building and three-dimensional homology mapping***

402 The 2.9 Å map was used for *de novo* atomic model construction of the VP1 protein in O  
403 (Jones et al., 1991). The initial atomic model was refined with phenix.real\_space\_refine (Adams  
404 et al., 2010) and manual adjustment in COOT (Emsley et al., 2010). The final model was further  
405 validated using MolProbity (Chen et al., 2010). The sequences of SaV VP1 proteins were aligned  
406 using CLUSTAL-W (Thompson et al., 1994). Identical and similar amino acid residues were  
407 defined according to the Risler matrix (Risler et al., 1988) and were mapped onto the surface of  
408 the SaV VP1 protein from GI. Nichinan using UCSF Chimera and ChimeraX software (Pettersen  
409 et al., 2004; Goddard et al., 2018).

410

#### 411 ***Data availability***

412 The cryo-EM map of the HuSaV VLP of the Nichinan strain has been deposited in the Electron  
413 Microscopy Data Bank under accession number EMD-30793. Atomic coordinates for the atomic  
414 model of the VLP have been deposited in the Protein Data Bank under accession number 7DOD.

415

416

417 **Figures**

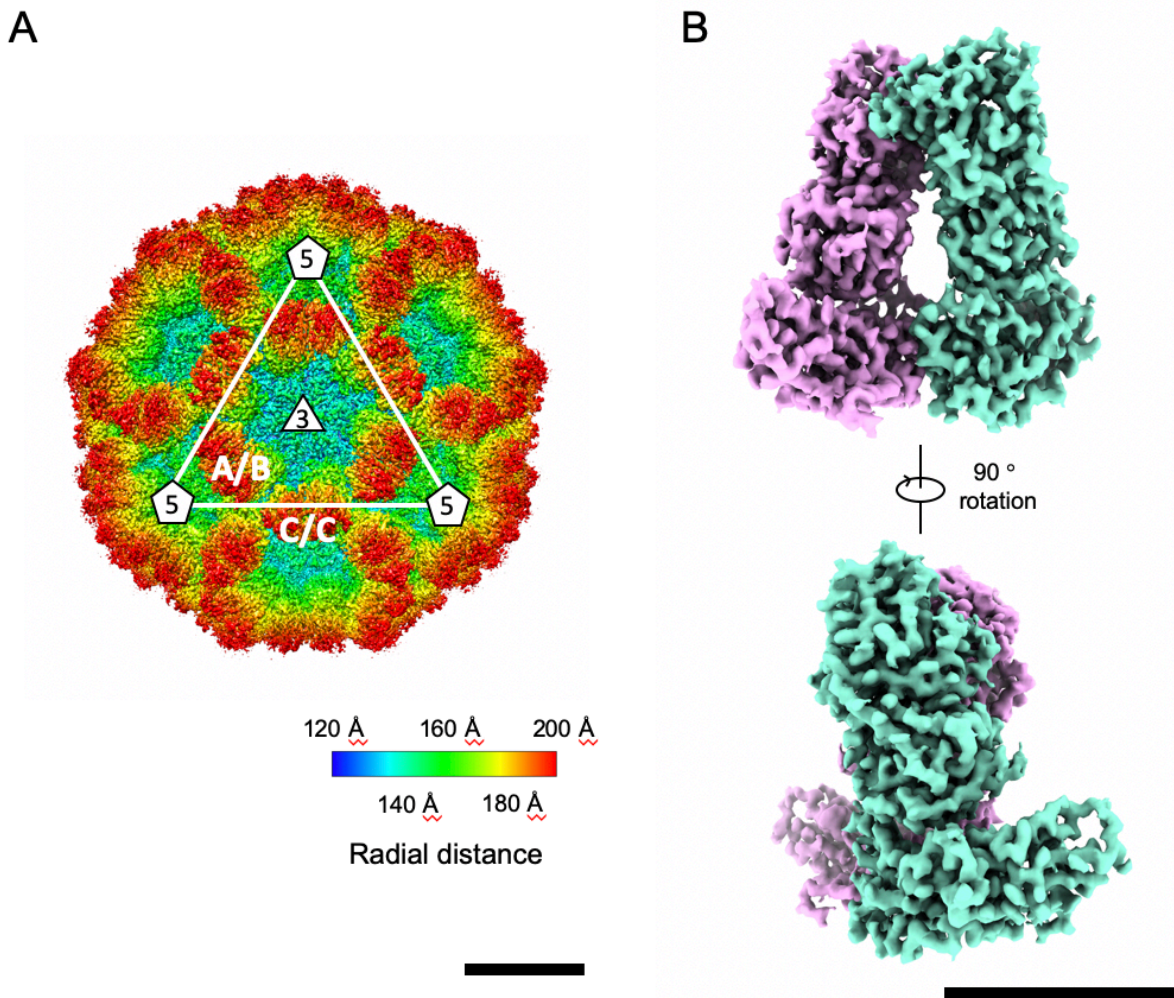

418

419 **Figure 1. Cryo-EM maps of the HuSaV-VLP.** A) Surface representation of the cryo-EM map

420 colored according to the distance from the center of the particle. Scale bar: 10 nm. B) Surface

421 representation of the cryo-EM map of a HuSaV VP1 C/C dimer. Monomers are colored light

422 green and pink. Scale bar: 5 nm.

423



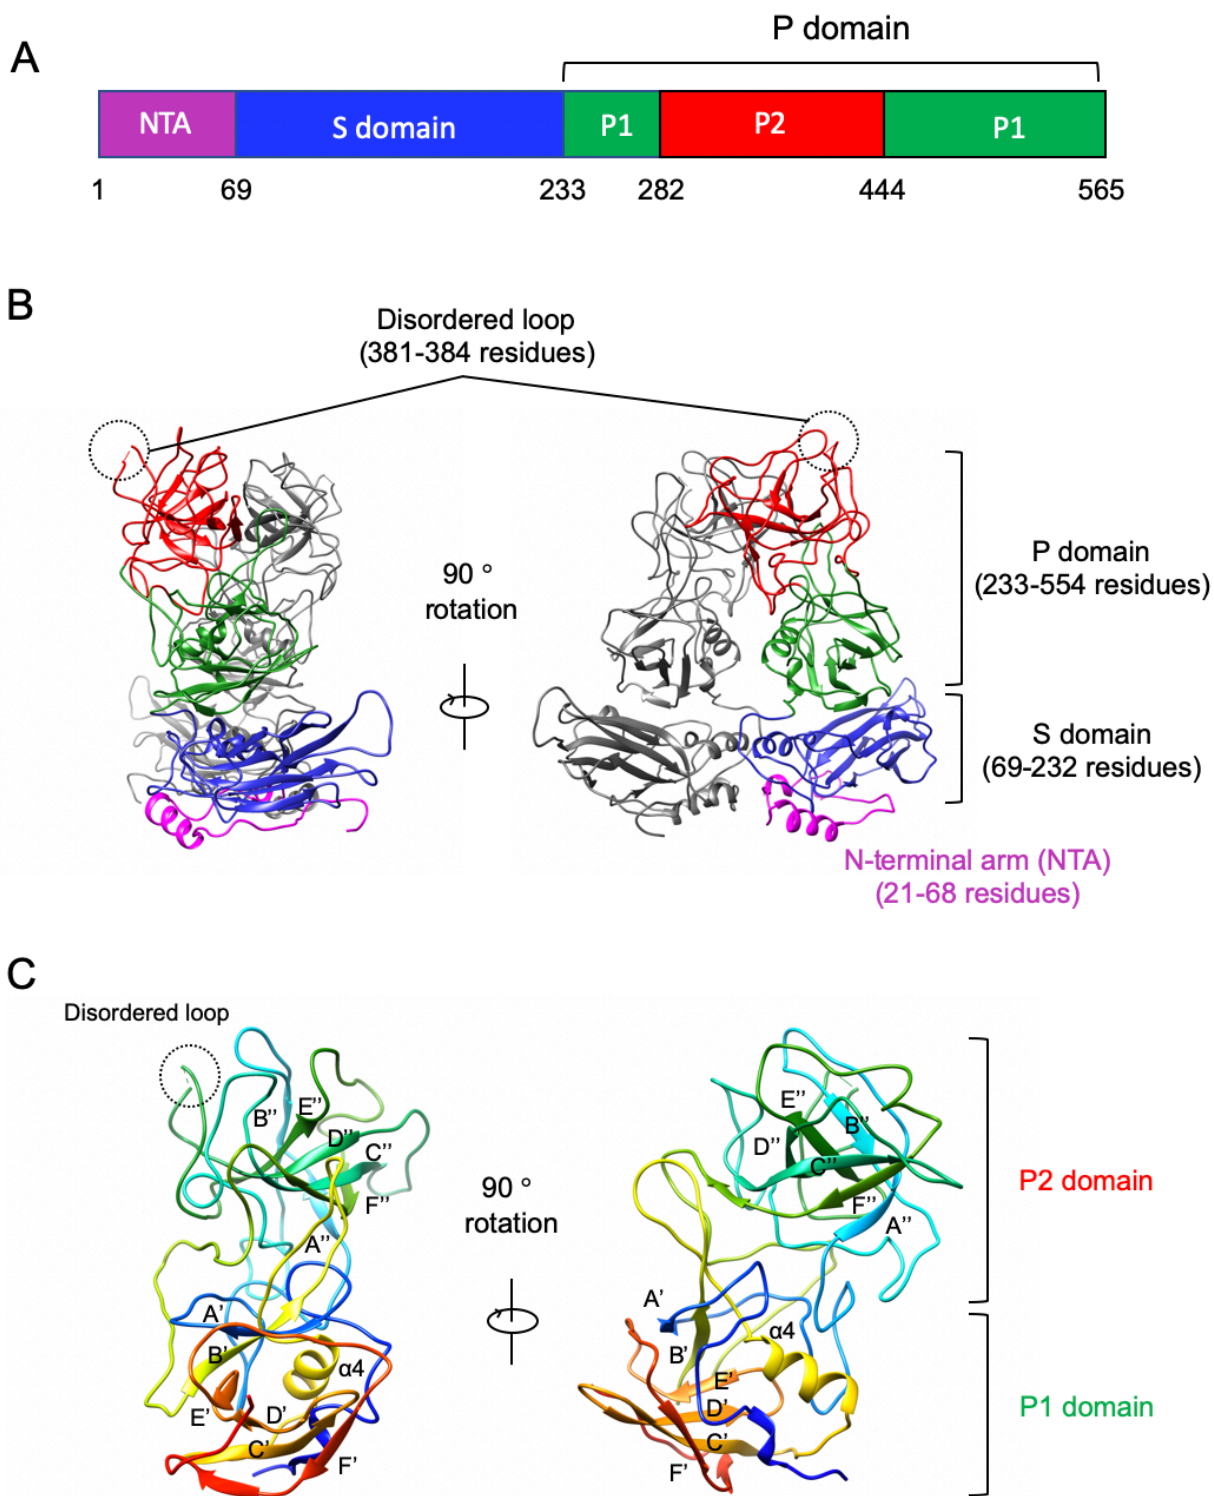

424

425 **Figure 2. Atomic structure of the HuSaV VP1.** A) Domain organization of the HuSaV VP1.

426 N-terminal arm (NTA), S domain, P1, and P2 subdomains are colored magenta, blue, green, and

427 red, respectively. B) Ribbon drawing of a HuSaV C/C dimer. An image (right) is drawn after the  
428 rotation of the left image by 90°. A disordered loop (residues 381–384) on the capsid surface is  
429 highlighted by a dotted circle. NTA, S domain, P1, and P2 subdomains in a monomer are colored  
430 similar to (A). C) Ribbon representation of a HuSaV P-domain. The P domain is rainbow colored  
431 with the N-terminus in blue and the C-terminus in red. An image (right) is drawn after the  
432 rotation of the left image by 90°. All secondary-structural elements are labelled.  
433

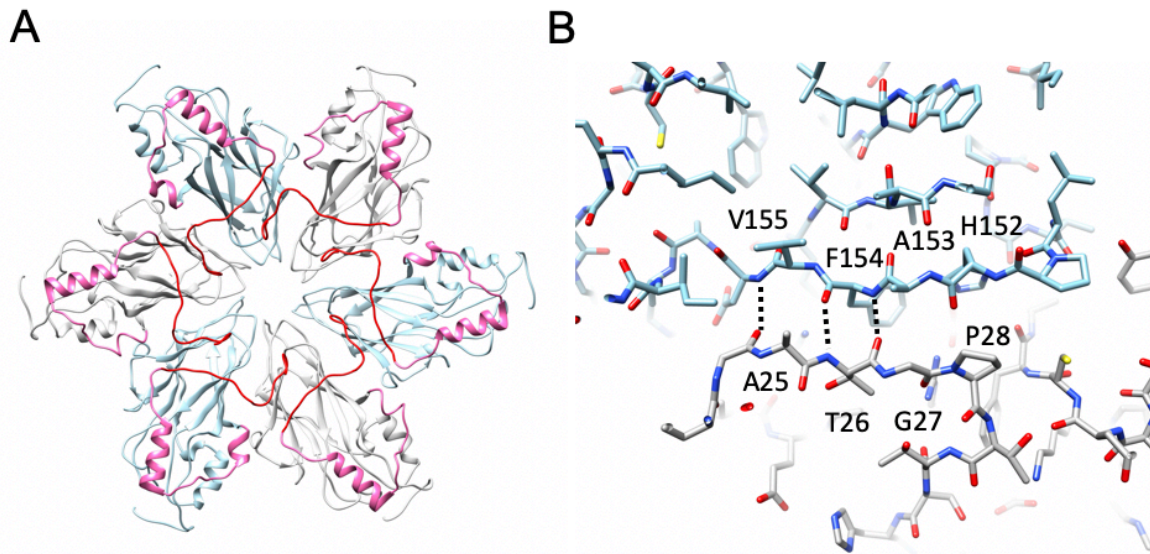

434

435 **Figure 3. N-terminal arm network of VP1.** A) Ribbon representation of S-domains around an  
436 icosahedral 3-fold axis viewed from the inside of the particle. S-domains of the B- and C-subunit  
437 are shown in gray and light blue, respectively. The N-terminal arms are highlighted by red  
438 (residues 22–37) and pink (residues 38–68). B) Inter-subunit  $\beta$ -sheet formed by the N-terminal  
439 arm. B- and C-subunits are shown in gray and light blue, respectively.

440



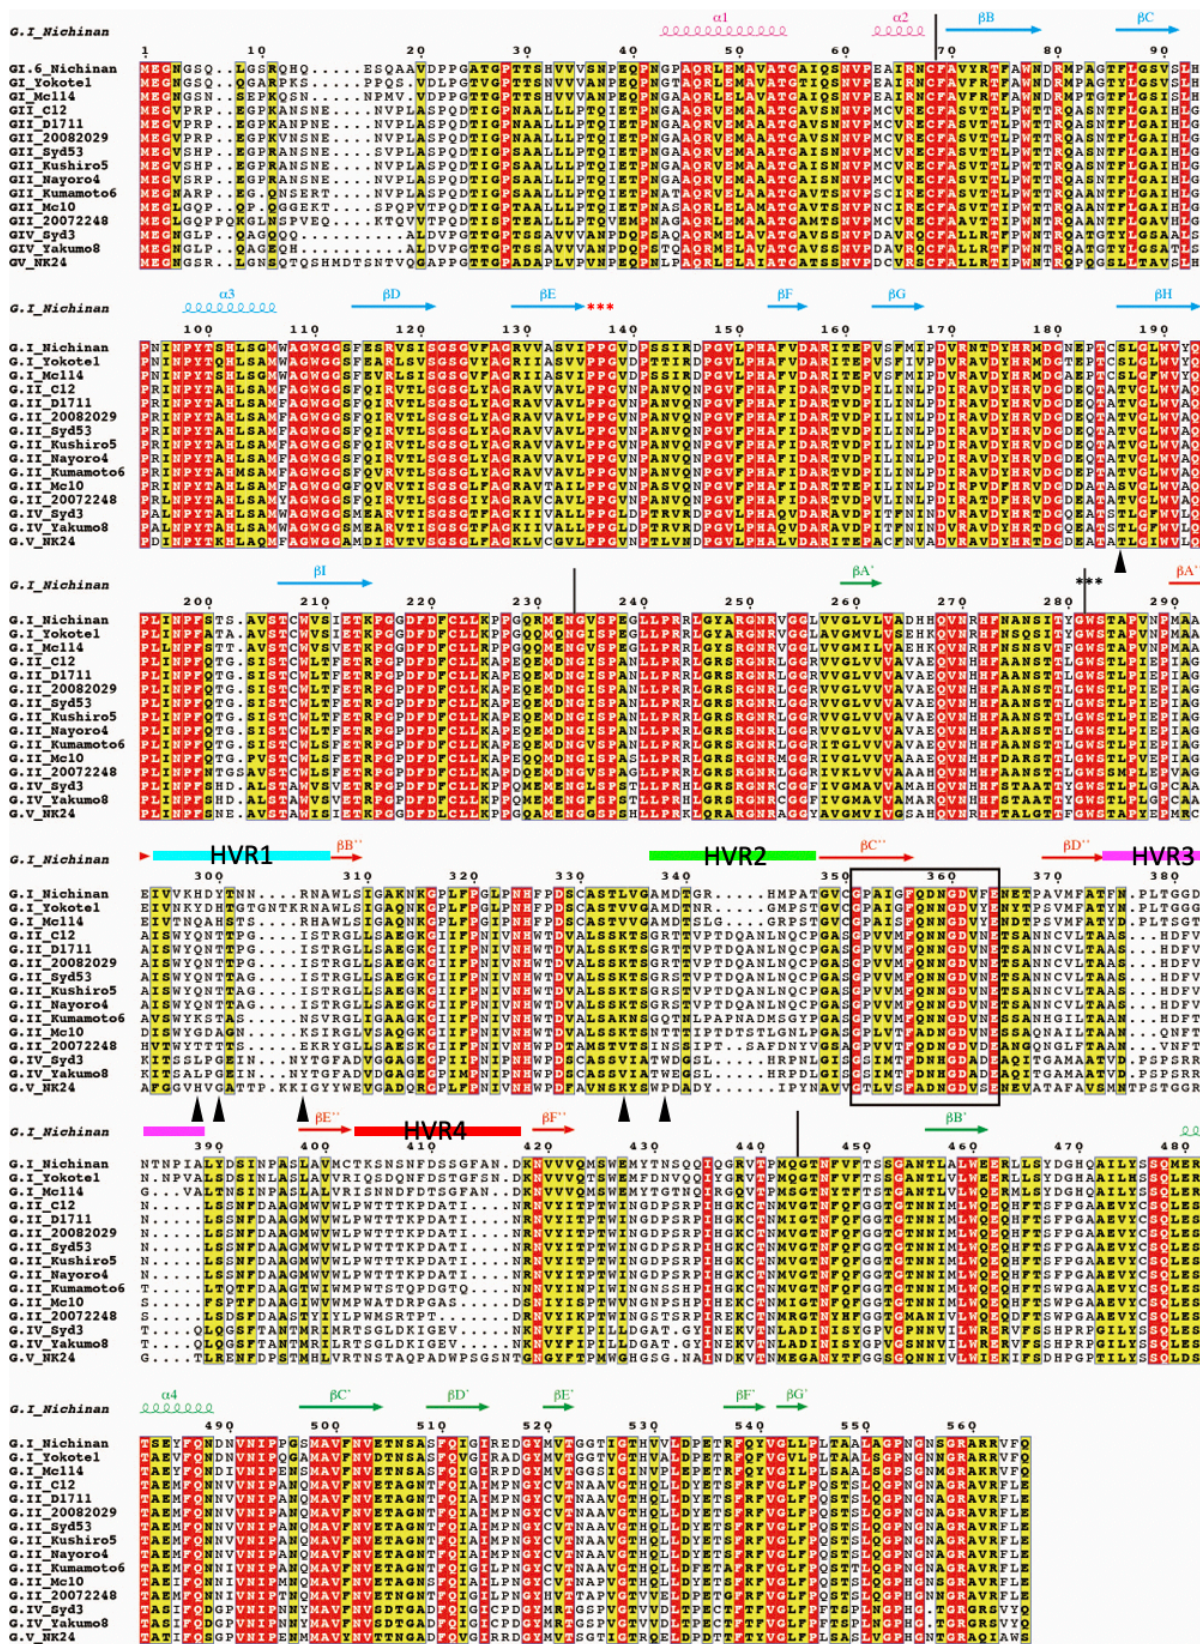

442 **Figure 4. Alignment of the amino acid sequences of the HuSaV VP1 proteins.** The  
443 secondary-structural elements are indicated over the sequences as a spiral ( $\alpha$ -helix) or an arrow  
444 ( $\beta$ -sheet) and are colored according to the domain regions (S: pink, P1: green, P2: orange). The  
445 regions of the S, P1, and P2 domains are also shown as pink, green, and orange lines below the  
446 secondary structural elements, respectively. Letters on a red and yellow background indicate  
447 identical and similar amino acids based on a *Risler* matrix (Risler et al., 1988), respectively.  
448 Gaps are shown as dotted lines. Figure is drawn by ESPript (Gouet et al., 2003).  
449



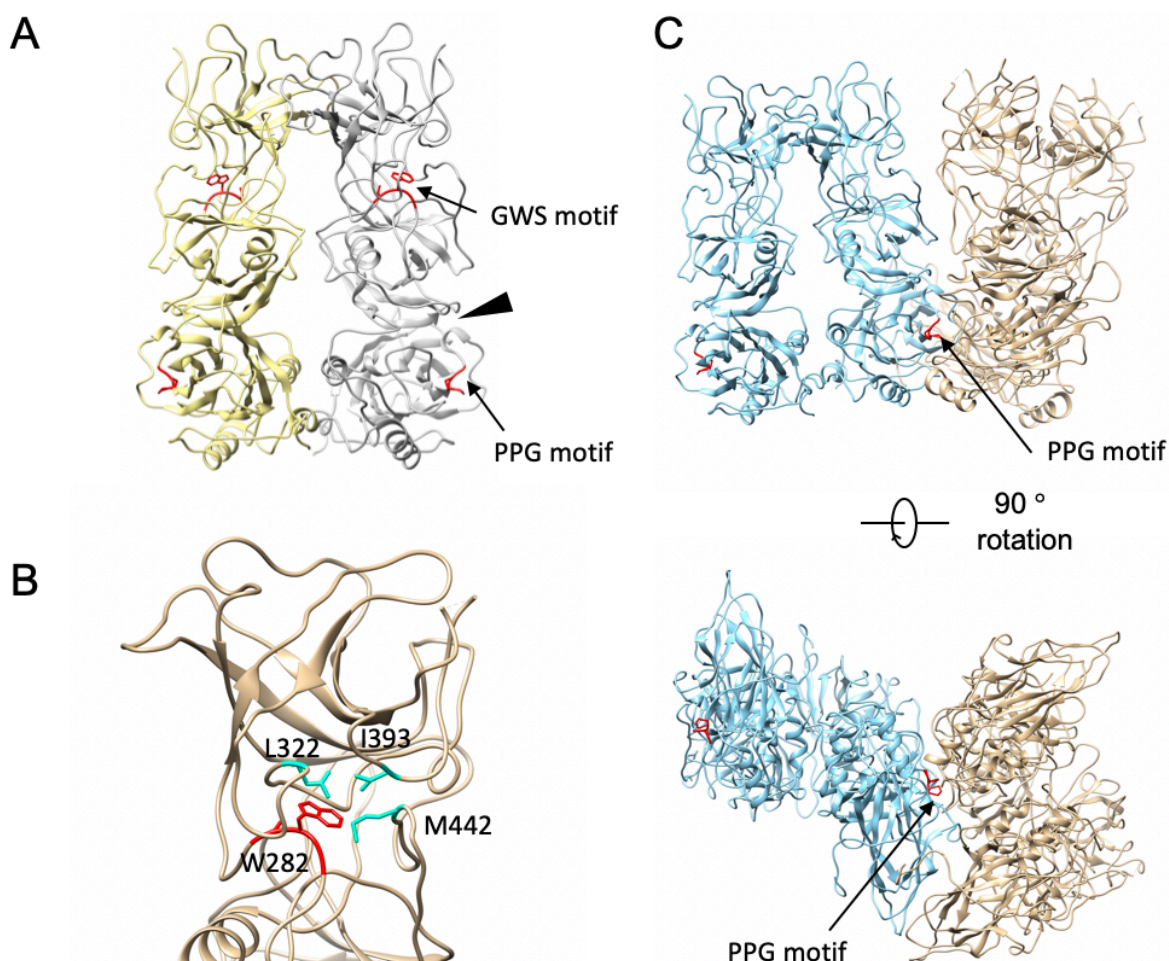

450  
451 **Figure 5. Conserved motifs among HuSaV VP1 proteins.** A) Ribbon representation of a  
452 HuSaV VP1 dimer showing two well-conserved motifs in the HuSaV VP1 protein, “PPG”  
453 (residues 136–138) and “GWS” (residues 281–283), highlighted by red. An arrowhead indicates  
454 the interaction between the loop following the PPG motif and P1 subdomain. B) The “GWS”  
455 motif exists at the domain boundary between the P1 and P2 subdomains, and W282 interacts  
456 with L322, I393, and M442 in the P2 subdomain. C) The “PPG” motif, colored red, is located at  
457 the inter-subunit interface between the S-domains. A/B and C/C dimers are colored sky-blue and  
458 gold, respectively.

459

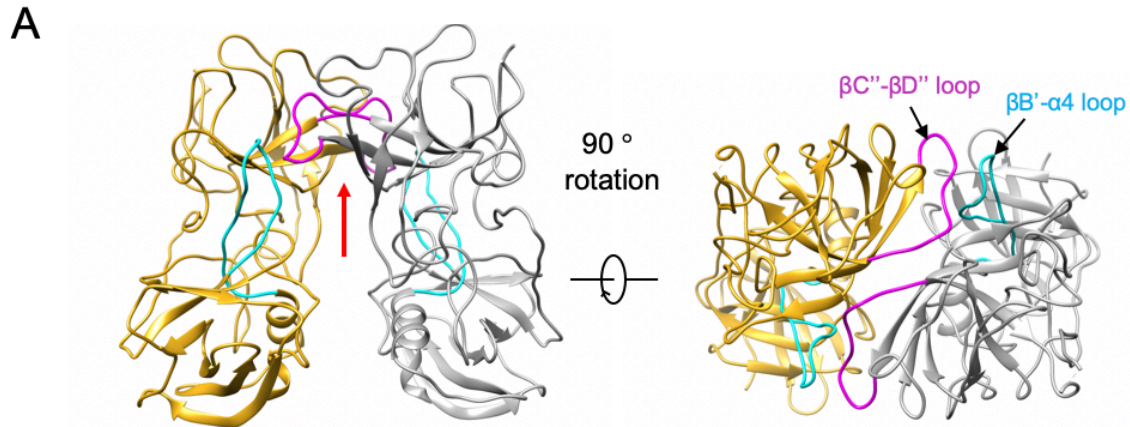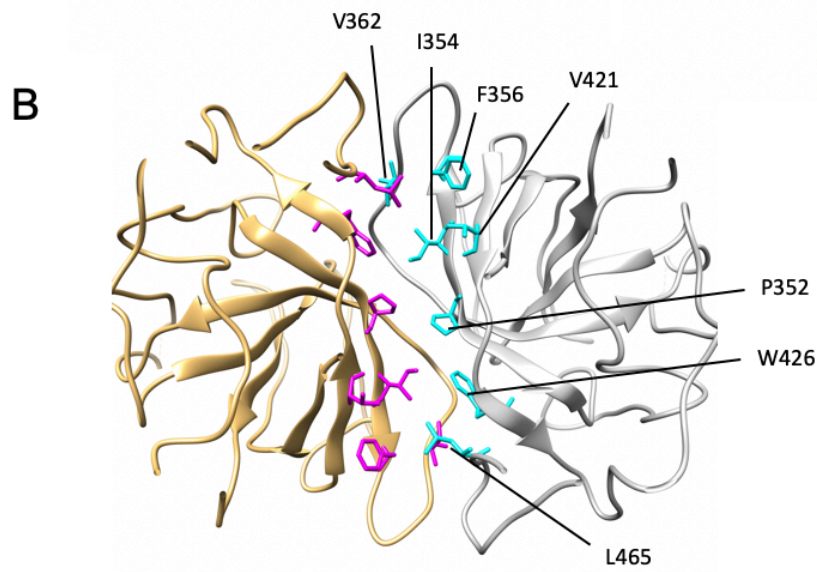

**C**

### Buried surface area between P domains in dimers of caliciviruses

|                         | P domain residues | Buried surface area between P domains (Å <sup>2</sup> ) |
|-------------------------|-------------------|---------------------------------------------------------|
| <u>Sapovirus</u>        | 233-554           | 1,100                                                   |
| Norovirus               | 226-520           | 1,500                                                   |
| <u>Vesivirus (SMSV)</u> | 362-703           | 1,700                                                   |
| <u>Lagovirus</u>        | 236-569           | 1,500                                                   |

460

461

462 **Figure 6. Dimeric interaction of P-domains.** A) Ribbon drawing of a HuSaV P-domain dimer.  
463 Two loops,  $\beta C''-\beta D''$  and  $\beta B'-\alpha 4$  loops, are highlighted by magenta and cyan, respectively. B)  
464 Hydrophobic interactions at the dimer interface viewed from the direction indicated by a red  
465 arrow in (A). C) Buried surface area between P domains in the dimers of caliciviruses.  
466



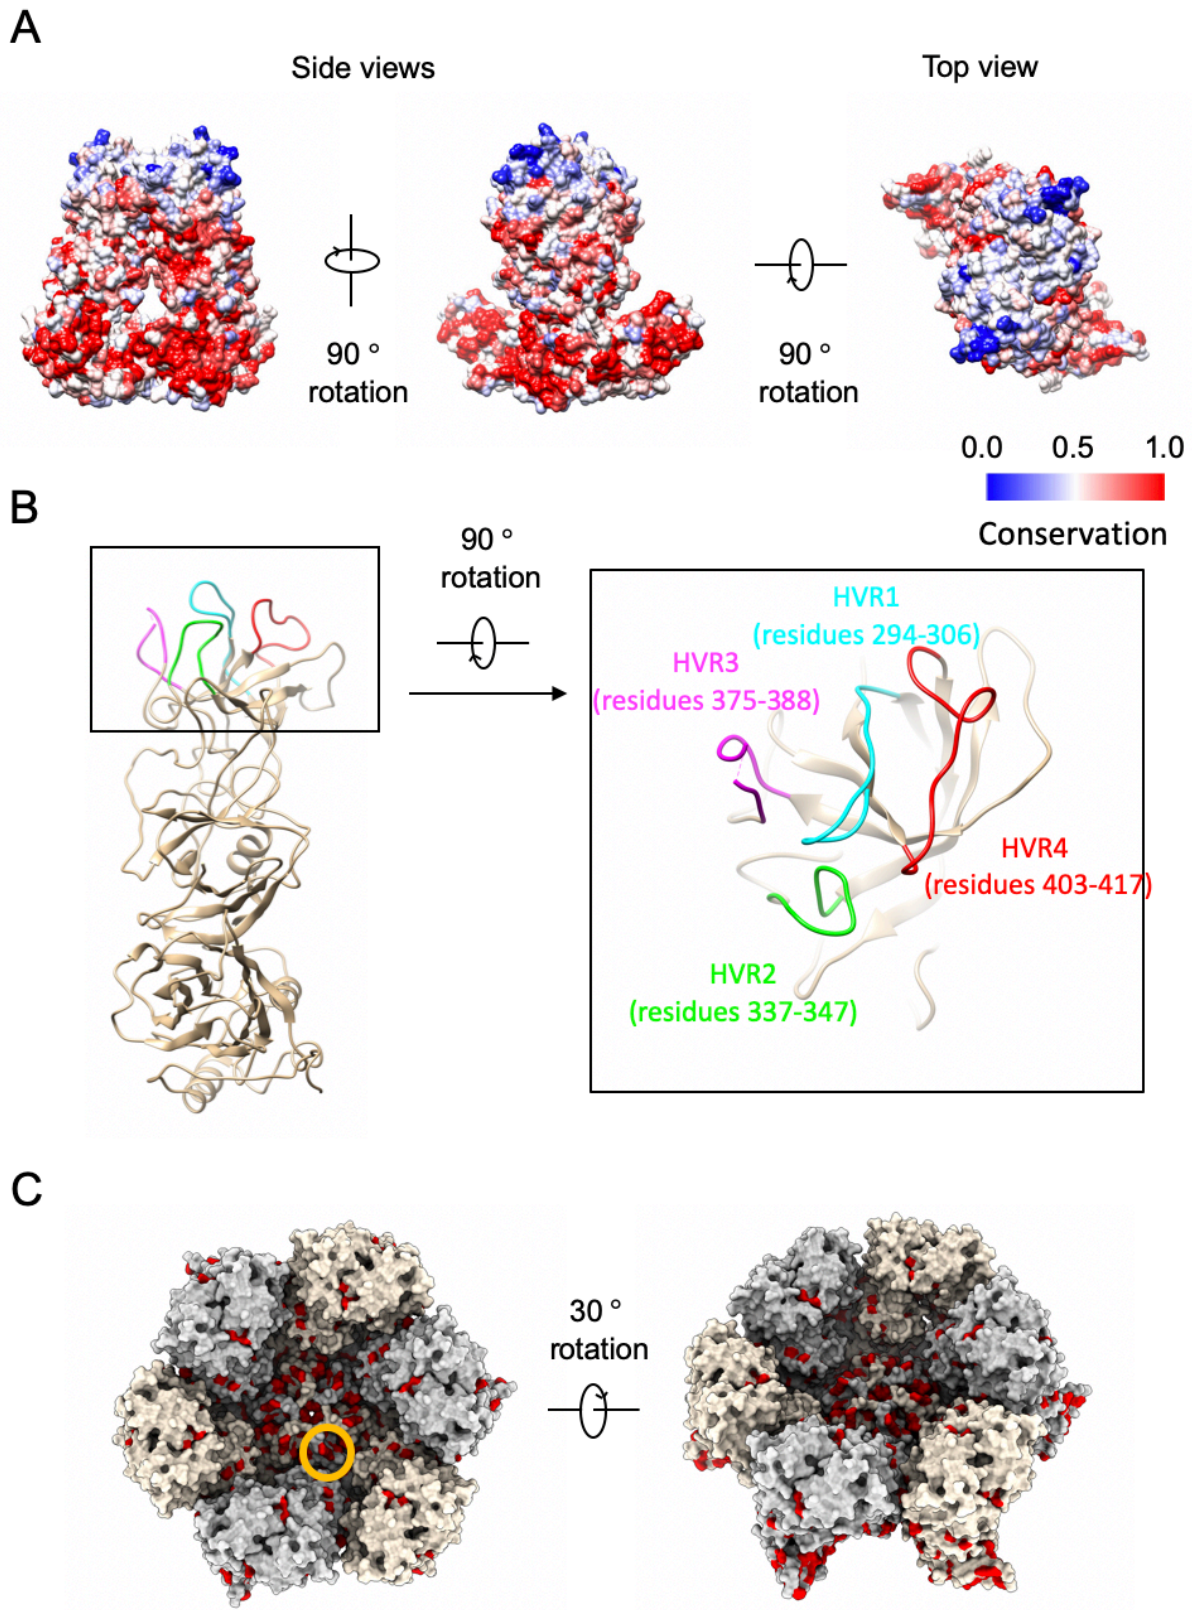

468 **Figure 7. Amino acid conservation and immune-responsible surface.** A) Conservation of  
469 amino acid residues of HuSaV VP1 proteins mapped onto the molecular surface of a dimer. Red  
470 indicates most conserved and blue indicates least conserved regions among the HuSaVs listed in  
471 Figure 3. B) Hyper variable regions (HVRs) of HuSaVs. Four HVRs, HVR1 to HVR4, are  
472 colored cyan, green, magenta, and red, respectively. C) Conserved amino acid residues are  
473 highlighted by red on the molecular surface of the VP1 proteins around an icosahedral 6-fold  
474 axis.  
475

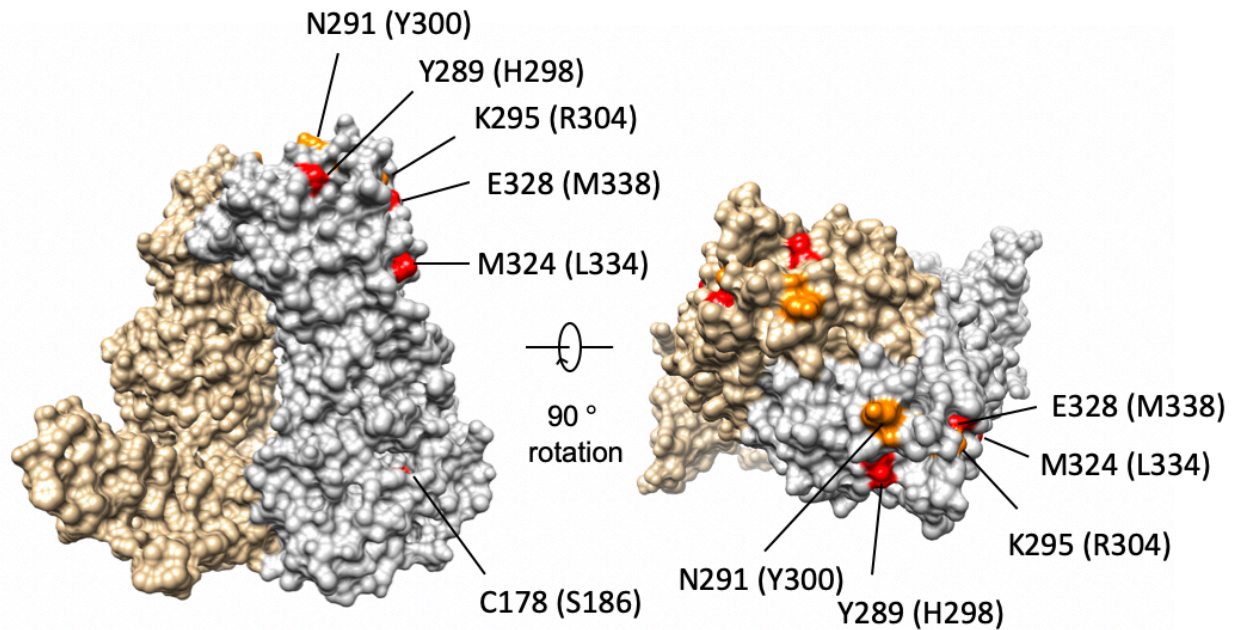

476

477 **Figure 8. Possible receptor binding position.** Six tissue culture-adapted mutation positions in  
478 the wild-type PoSaV Cowden strain are mapped on a molecular surface of a VP1 dimer in a  
479 Nichinan strain. Four essential and two functional mutation positions are labeled and colored red  
480 and orange, respectively. The corresponding amino acid residues in the Nichinan strain is  
481 enclosed in parentheses.
